# Supplementary material for: Influence of percentage of guanine molecules, OH radicals, UV irradiation and temperature on electrooxidation of short synthetic oligonucleotides
Source: Royal Society of Chemistry journal article supplement (doi:10.1039/c0cp02667k), 2011-01-01
Supplement: c0cp02667k.pdf [file c0cp02667k.pdf]

# Supplementary material for „Influence of percentage of guanine molecules, OH radicals, UV irradiation and temperature on electrooxidation of short synthetic oligonucleotides”

Anna Maria Nowicka,<sup>a\*</sup> Ewelina Zabost,<sup>a</sup> Edyta Gilant,<sup>a</sup> Zbigniew Stojek<sup>a\*</sup>

<sup>5</sup> Received (in XXX, XXX) Xth XXXXXXXXXX 200X, Accepted Xth XXXXXXXXXX 200X

First published on the web Xth XXXXXXXXXX 200X

DOI: 10.1039/b000000x

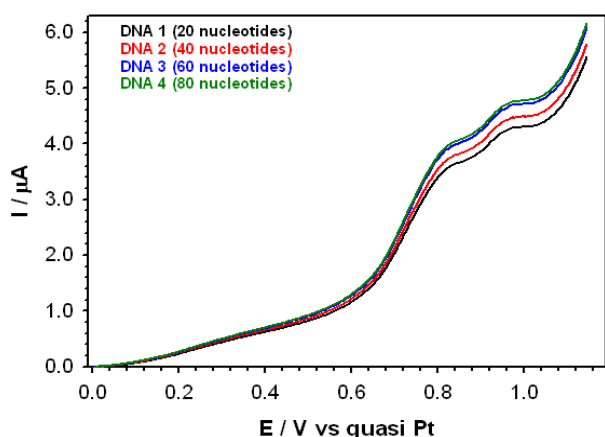

**Fig. 1S** Typical anodic square wave voltammograms obtained for dsDNA of different length. DNA concentration: 38  $\mu$ M; 0.02 M PBS buffer (pH 7.4); glassy carbon disk electrode of diameter 3 mm; frequency = 20 Hz; guanine percentage: 50 %.

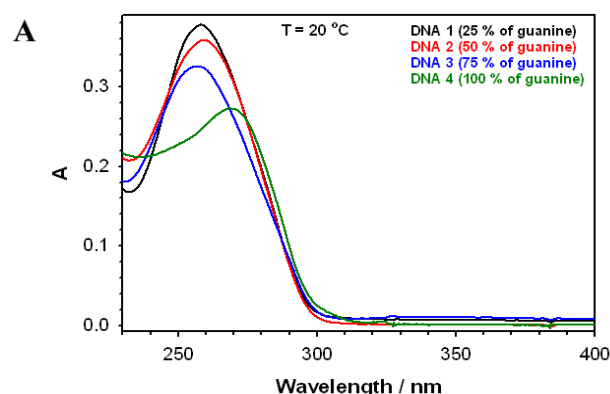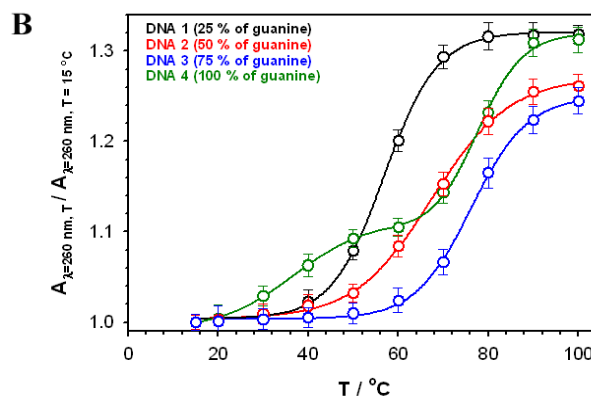

**Fig. 2S** (A) UV spectra of dsDNA (20-nucleotides long) containing different amount of guanine; room temperature. (B) Plots of normalized absorbance vs. temperature. Conditions: DNA concentration 28  $\mu$ M. Other conditions as in Figure 1S.
